# Supplementary material
Source: HighWire-hosted journal article supplement (https://bmjopen.bmj.com/content/9/9/e030636)
Supplement: inline-supplementary-material-1 [file inline-supplementary-material-1.pdf]

## Keyword categories and examples of assigned keywords

|                                |                                                                                                                                                                                                                                                                                    |
|--------------------------------|------------------------------------------------------------------------------------------------------------------------------------------------------------------------------------------------------------------------------------------------------------------------------------|
| Accident/Trauma                | Fall, traffic and other accidents                                                                                                                                                                                                                                                  |
| Cardiovascular                 | Myocardial infarction, collapse, heart complaints                                                                                                                                                                                                                                  |
| Internal disease (unspecified) | Undefined problem (internal medicine)                                                                                                                                                                                                                                              |
| Neurologic                     | Stroke, Seizure                                                                                                                                                                                                                                                                    |
| Respiratory                    | Respiratory distress, asthma                                                                                                                                                                                                                                                       |
| Pediatric                      | Child sick or injured                                                                                                                                                                                                                                                              |
| Gastrointestinal               | Abdomen, gastro-intestinal bleed                                                                                                                                                                                                                                                   |
| Other emergency (unspecified)  | Other emergency (undefined problem)                                                                                                                                                                                                                                                |
| Intoxication/Poisoning         | Alcohol, drugs, medication                                                                                                                                                                                                                                                         |
| Other keywords                 | Consciousness (unconsciousness, patient without signs of life), Obstetrical/Gynecological (gynecological bleed, parturition), Person in danger (Person in need of assistance, entrapped in residence, stand by in case of fire), Suicide (Suicide and attempted suicide), Bleeding |
